# Supplementary material for: Who Packed the Drugs? Application of Bayesian Networks to Address Questions of DNA Transfer, Persistence, and Recovery from Plastic Bags and Tape
Source: MDPI journal article supplement (doi:10.3390/genes13010018), 2021-12-22
Supplement: s1 [file s1]

## Supplementary material S1

### Derivation of formulae from experiment 2: Cardboard drug wraps

#### 1. Case circumstances

Both  $H_p$  and  $H_d$  agree that Mr. A packaged the drugs.  $H_p$  asserts that Mr B packaged the drugs along with Mr. A.  $H_d$  asserts that he did not package the drugs, he had previously handled the tape that was subsequently used by Mr. A. The proposition under  $H_p$  discounts this possibility.

There are four possible outcomes in the results (discounting mixtures from unknown contributors with this example)

Only A is observed

Only B is observed

A and B are observed

No DNA is observed

#### 2. Nomenclature:

$t_A$ : Direct transfer from Mr. A

$t_B$ : Direct transfer from Mr. B

$s$ : Transfer from Mr B previously handling the tape

#### 3. Outcomes

##### 3.1 Only A is observed

Under  $H_p$ :

DNA has transferred from Mr A because of packing the drugs jointly with Mr. B. DNA from Mr B has not transferred during packing. The probability of this is  $t_A(1 - t_B)$

Under  $H_d$ :

the DNA from A has come from packing and DNA has not transferred from previous contact with the tape by B The probability of this is  $t_A(1 - s)$

The likelihood ratio is:  $LR = \frac{(1-t_B)}{(1-s)}$

### 3.2 Only B is observed

Under  $H_p$ :

Mr B handled the tape with Mr. A . DNA from A was not transferred during the packing, but DNA from B was. The probability of this is  $t_B(1 - t_A)$

Under  $H_d$ :

Mr B only handled the tape. Mr A's DNA was not transferred during packing. This probability is  $s(1 - t_A)$

The likelihood ratio is:  $LR = \frac{t_B(1-t_A)}{s(1-t_A)} = \frac{t_B}{s}$

### 3.3 A and B are observed

Under  $H_p$ :

Mr B handled the tape with Mr. A The probability of this is  $t_A t_B$

Under  $H_d$ :

DNA has transferred from Mr A during packing and DNA has transferred from Mr B to the package as a result of him previously handling the tape. The probability of this is  $st_A$

The likelihood ratio is  $LR = \frac{t_B}{s}$

### 3.4 No DNA observed

Under  $H_p$ ,

No DNA has been transferred from Mr A or Mr B during packaging. The probability is  $(1 - t_A)(1 - t_B)$

Under  $H_d$ ,

DNA has been transferred from Mr A during packaging or from Mr B from previously handling tape. The probability is  $(1 - t_A)(1 - s)$

The likelihood ratio is  $LR = \frac{1-t_B}{1-s}$

#### 4. Log-normal Distribution fitting to the data

The analysis of the data files in supplement 2 were carried out with the R package *fitdistrplus* using the *lnorm* function to fit log-normal distributions of  $\overline{RFU}$ , the mean RFU of a profile, possibly scaled with mix-prop. to obtain individual specific contribution. Data where  $\overline{RFU} < 0.1$  were excluded from the preliminary analysis, because there are a large number of values at zero (or close to zero) which cannot be modelled. The *plnorm* function computes the cumulative probability  $\Pr(\overline{RFU}' < x)$ , where  $x$  is a threshold  $\overline{RFU}'$  value; note  $\overline{RFU}'$  signifies that only non-zero  $\overline{RFU}$  data are included in this analysis.

$$\Pr(\overline{RFU}' < x) = \Phi((\ln x - \mu)/\sigma)$$

$\Phi$  is the cumulative density function of the normal distribution and  $\mu$  and  $\sigma$  are fitted model parameters.

Probabilities must be assigned from the complete dataset, hence rescaling is required to include the proportion of data ( $k$ ) where  $\overline{RFU} < 0.1$ . Also we want to determine the probability that  $\overline{RFU}$  is *greater* than threshold value  $x$ . The rescaled value is:

$$\Pr(\overline{RFU} > x) = 1 - (k + ((1 - k) \times \Pr(\overline{RFU}' < x)))$$

Provided that  $x > 0$ .

#### 4.1. Case example 1: The zip-lock drugs bag experiment data

##### 4.1.1. Analysis of $\overline{RFU}$ dataset from personal bag data $E2_{pbag}$

The probability of secondary transfer ( $s$ ) is assigned from log normal distributions fitted to mean  $\overline{RFU}_{E2_{pbag}}$  data - the personal bag data from supplement 2 (fig. S1). The fitted parameters were mean log = 4.58 and sd log = 2.57. The secondary transfer probabilities were derived from E2 data, the same as described in the previous section. Background was rarely observed in this dataset and was assigned a value  $\Pr(b)=0.05$ . Since there were too few observations to model, it was assumed to have the same distribution of dataset  $\overline{RFU}_{E2_{pbag}}$ ; rescaled to  $k=0.95$  (as described in section 4, this supplement).

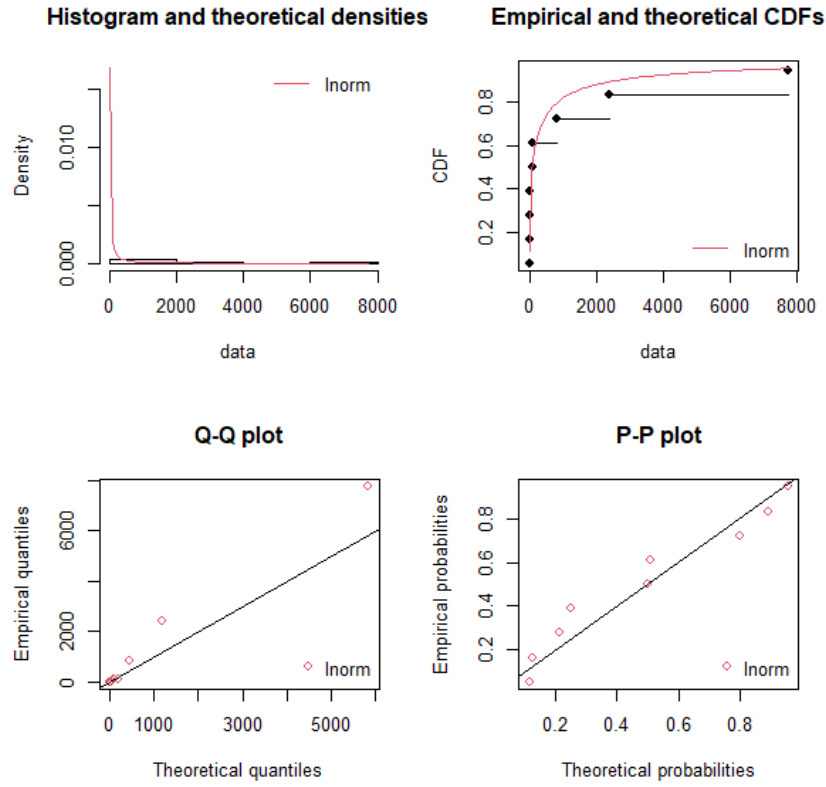

Figure S1: Log normal distribution fit to the personal bag data  $\overline{RFU}_{E2pbag}$ .

#### 4.1.2. Analysis of $\overline{RFU}$ dataset from ziplock drugs bag data $E1_{dbag}$

Log normal distribution fitted to  $\overline{RFU}_{E1dbag}$  data (direct transfer to the ziplock drugs bag) provided parameters: mean log=4.78 and sd log= 1.84 (fig S2)

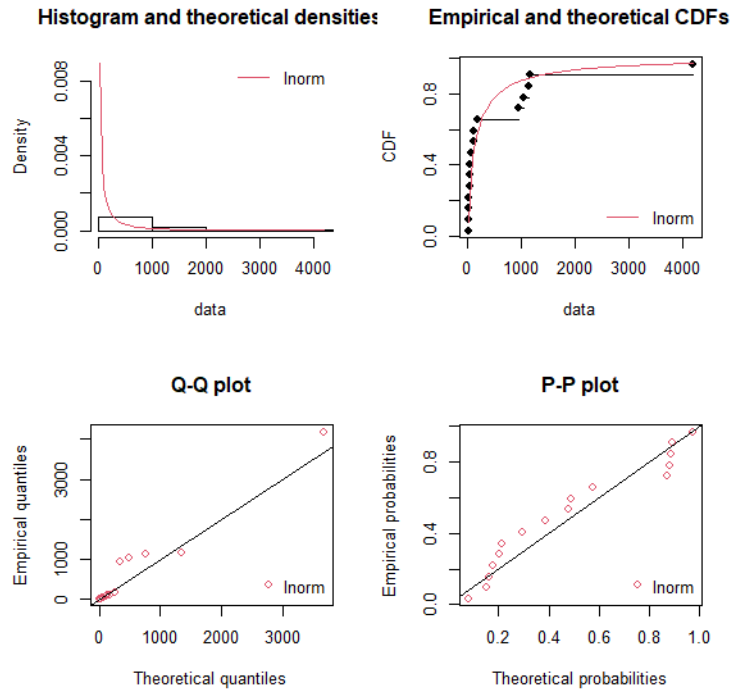

Figure S2: Log normal distribution fit to the ziplock drugs bag data  $\overline{RFU}_{E1dbag}$ .

## 4.2 Case example 2: The cardboard drug wraps

### 4.2.1. Analysis of $\overline{RFU}$ dataset from drugs packer ( $C1_{pack}$ ).

Log normal distribution fitted to  $\overline{RFU}_{C1pack}$  data (direct transfer to the ziplock drugs bag) provided parameters: mean log=5.16 and sd log = 1.24 (fig S3).

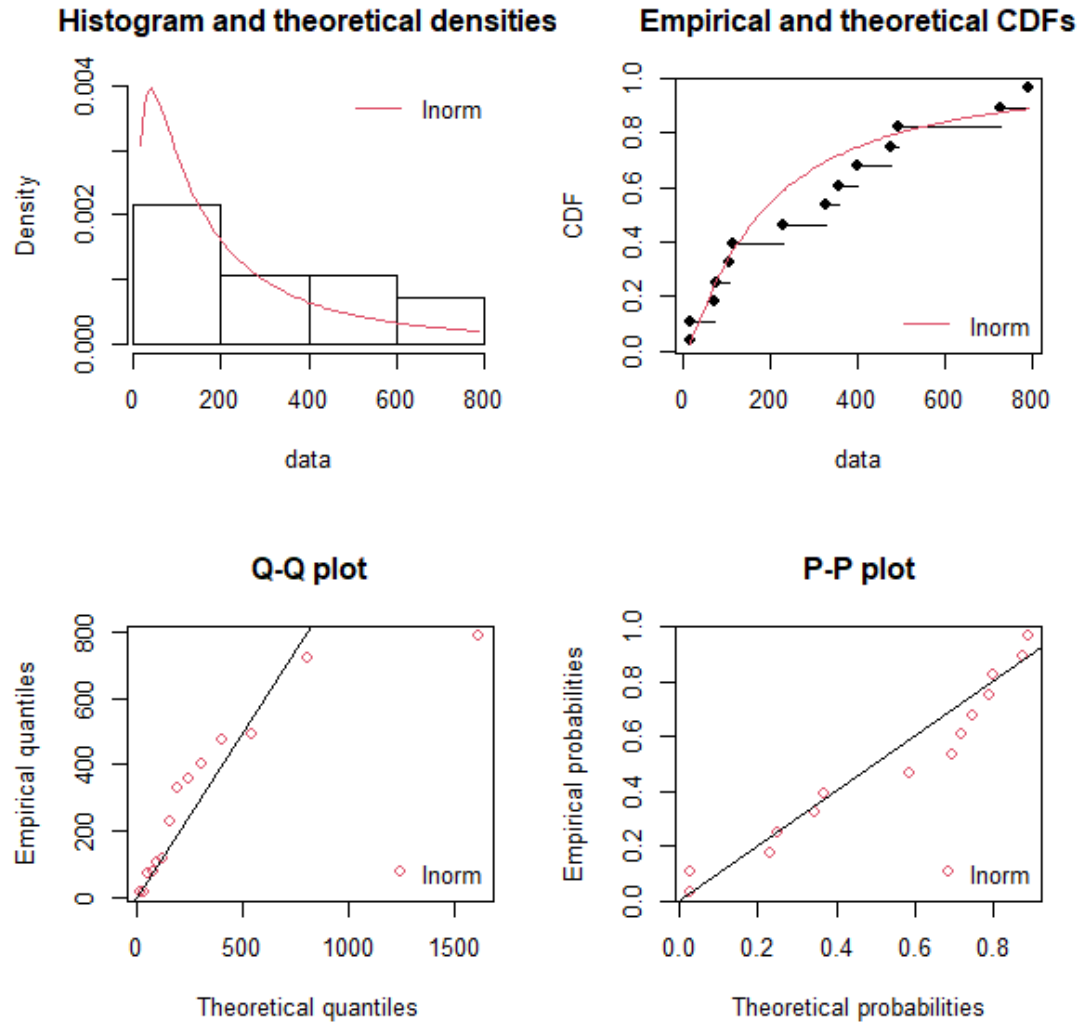

Figure S3: Log normal distribution fit to the ziplock drugs bag data  $\overline{RFU}_{C1pack}$ .

#### 4.2.2. Analysis of $\overline{RFU}$ dataset from previous user of tape ( $C2_{tape}$ ).

Log normal distribution fitted to  $\overline{RFU}_{C2tape}$  data (direct transfer by a previous user of the tape) provided parameters: mean log = 4.14 and sd log = 1.32. (fig S4).

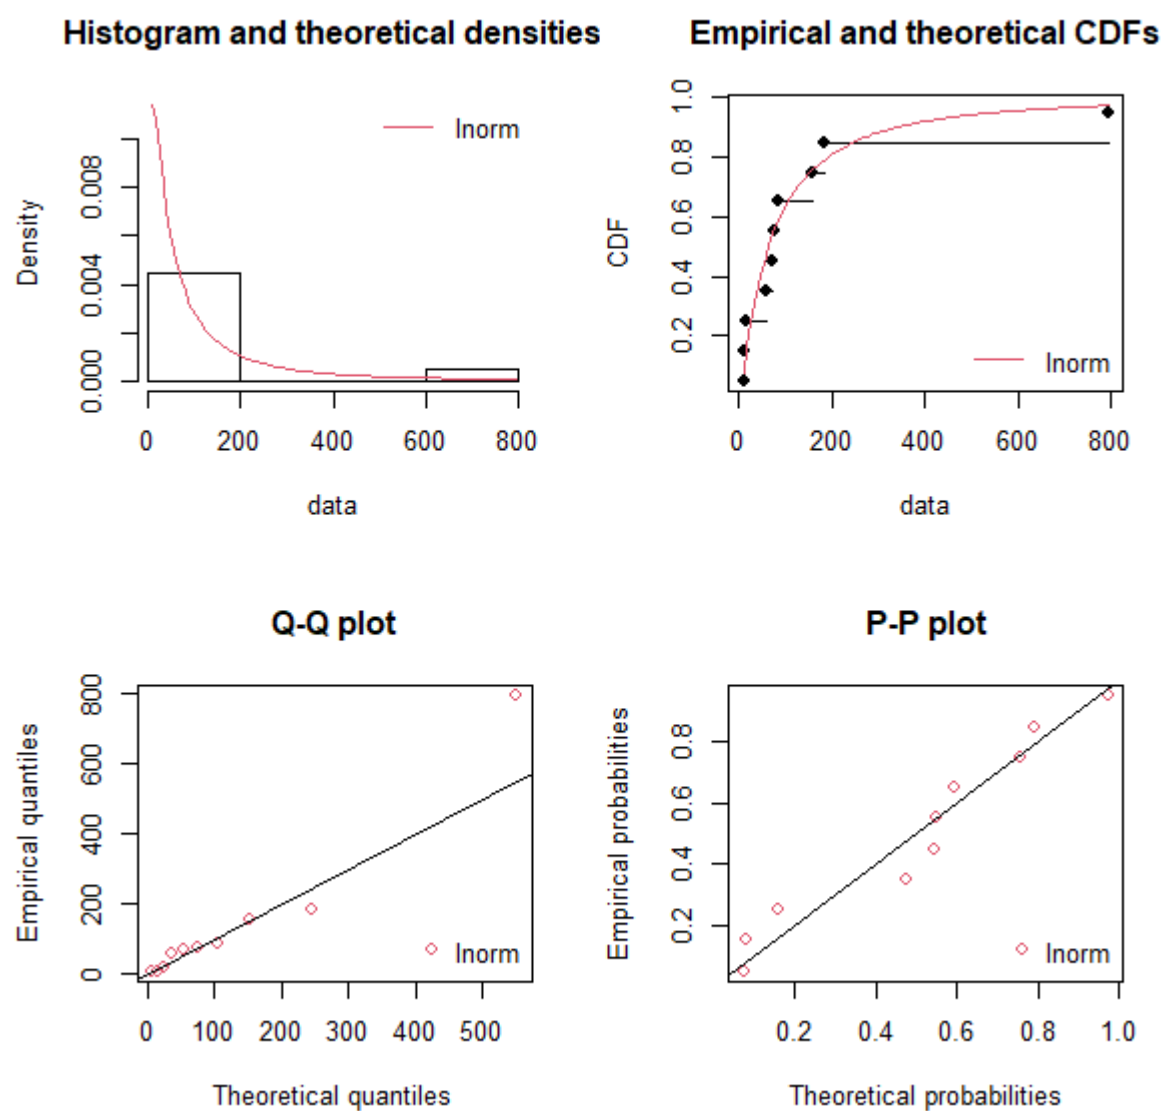

Figure S4: Log normal distribution fit to the previous user of tape data  $\overline{RFU}_{C2tape}$ .
